## RESEARCH ARTICLE

# The relationship between staying at home during the pandemic and the number of conceptions: A national panel data analysis

Luca Moreno-Louzada <sup>1</sup>, Naercio Menezes-Filho <sup>1,2\*</sup>**1** University of São Paulo, São Paulo, SP, Brazil, **2** Insper, São Paulo, SP, Brazil\* [naercioamf@insper.edu.br](mailto:naercioamf@insper.edu.br)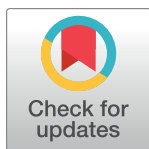 OPEN ACCESS

**Citation:** Moreno-Louzada L, Menezes-Filho N (2023) The relationship between staying at home during the pandemic and the number of conceptions: A national panel data analysis. PLOS ONE 18(8): e0289604. <https://doi.org/10.1371/journal.pone.0289604>

**Editor:** Bolanle Bose Olapeju, Uniformed Services University: Uniformed Services University of the Health Sciences, UNITED STATES

**Received:** August 12, 2022

**Accepted:** July 21, 2023

**Published:** August 11, 2023

**Copyright:** © 2023 Moreno-Louzada, Menezes-Filho. This is an open access article distributed under the terms of the [Creative Commons Attribution License](https://creativecommons.org/licenses/by/4.0/), which permits unrestricted use, distribution, and reproduction in any medium, provided the original author and source are credited.

**Data Availability Statement:** Data and code underlying the results presented in the study are available at: <https://github.com/lucamlouzada/Replication-data-for-Covid-Fertility-manuscript>

**Funding:** The authors acknowledge funding from the São Paulo Research Foundation (FAPESP): grant number 2020/16326-6 (LML) and grant number 2019-553-0 (NMF). The funders had no role in the study design, data collection and

## Abstract

Whether the COVID-19 pandemic has changed fertility patterns is still an open question, as social isolation for long periods can impact the number of conceptions in many ways. We combine administrative data on all recent births in Brazil with daily data on individual location to estimate the relationship between the share of individuals staying close to their homes in each week and the number of conceptions in that same week, comparing municipalities with different social isolation patterns during the first semester of 2020. We find that conceptions unequivocally decline when social isolation increases. The effect is stronger for women who are between 21 and 25 years old and more educated, as well as for richer, larger, and more urban municipalities. COVID-19 is likely to change fertility across countries depending on the behavior of the population and on the lock-down measures implemented to fight the pandemic.

## Introduction

The Coronavirus disease 2019 (COVID-19) pandemic has significantly impacted several dimensions of human populations [1, 2]. While the main focus of media reports and scientific research has been on death tolls and vaccines, speculations have been made about possible fertility and birth changes during and after outbreaks. Some analysts have talked about a potential “baby boom” caused by the stay-at-home orders, which could lead couples to spend more time together and increase sexual activity [3]. Moreover, a report by the United Nations predicted that the decrease in the availability of family planning services and modern contraceptives could lead to millions of unintended pregnancies [4]. Others have argued that we should expect a “baby bust”, instead, as rising financial instabilities and overall uncertainty would contribute to couples abandoning or postponing pregnancy plans. Such a fall in pregnancies was observed during the 1918 influenza pandemic and the 2008 global financial crisis [5, 6].

The outlook is not clear, and it seems likely that there will be heterogeneous effects, both between and within countries. In high-income countries, where women generally have more control over their fertility, a reduction in work-life balance, followed by financial struggles caused by the economic downturn and restricted access to assisted reproductive technologies,

analysis or decision to publish. They did provide feedback on the draft of the manuscript. There was no additional external funding received for this study.

**Competing interests:** The authors have declared that no competing interests exist

may cause conceptions to decrease [7, 8]. Conversely, in medium and low-income countries, especially in rural areas, limited contraceptive methods and increases in poverty rates could lead to rising birth rates.

Other than socioeconomic disruptions caused by the pandemic, the virus itself may affect fertility. Studies have shown that COVID-19 infection may have temporary physiological impacts on both female and male fertility, affecting the menstrual cycle and semen quality [9–11]. Additionally, there were concerns about potential effects of vaccination on fertility, but recent evidence has shown there were no significant adverse effects [12, 13].

Early in the pandemic, evidence pointing towards a “baby bust” was seen in surveys showing revisions in pregnancy plans. Respondents reported postponing or abandoning previous intentions to conceive in European countries and in the United States [14, 15]. Yet, in another survey in the US, women reported having more difficulty accessing contraceptives, particularly among those most financially affected during the crisis, which could increase risks of unwanted pregnancies [16].

As preliminary data from the last quarter of 2020 became available, declines in crude birth rates were observed in rich countries [17, 18]. In Europe, this drop was associated with duration of lockdowns at the national level [19]. Evidence for medium and low-income countries, however, has been scarce. One study used data from telephone interviews in four countries in Africa, finding no indication of rising pregnancy rates during 2020 [20]. Another analyzed data from Moldova and found that there were reductions in pregnancy intentions and restrictions to some contraceptive methods, though these were largely offset by switches to other readily available methods [21]. Detailed analyses about possible causal mechanisms (financial instability vs fear of death vs lockdown related stress) have been sparse. One study analyzed a few counties in the United States and found that declines in birth rates were steeper where there were more infections of COVID-19 and more pronounced mobility reductions [22]. Another showed that social distancing policies in Japan were associated with reductions in pregnancies and areas with more rigorous precautions had a steeper decline [23]. Using an event study and difference-in-differences design with data on the United States and Europe, [24] found significant effects of lockdowns on Google searches for pregnancy-related term such as pregnancy tests and emergency contraception. Finally, a study using a difference-in-differences approach in Australia found that lockdowns had negative impacts on women’s fertility intentions [25]. We contribute to this literature by combining administrative microdata on all Brazilian births and fetal deaths, which allows us to calculate weekly conception numbers by municipality, with municipality-level daily geographical isolation data, to explore the impact of social isolation on the number of conceptions.

Regarding Brazil, previous literature studied the effect of the Zika epidemic in mid 2010s, showing that there was a decrease in conceptions probably caused by pregnancy postponement and increases in abortions [26]. These declines were steeper for more educated and younger women [27]. Still, there are significant differences between the Zika epidemic and the COVID-19 pandemic. Importantly, Zika was associated with microcephaly [28] so that one of the reasons for pregnancy postponing might have been fear of congenital malformations. This would not be a main factor in the current pandemic. In addition, the incidence and scale of the COVID-19 pandemic was much greater, with consequences spanning several socioeconomic areas. Implications for women’s health in particular have been extremely unequal across regions and income levels. Conceptions can increase if women’s control over their fertility choices are being reduced due to gender violence and mental health complications or if access to contraception is restricted [29]. Therefore, the extent and direction to which the pandemic might affect conceptions is unclear, and evidence for middle and low-income countries has been extremely limited.

In this context, this study aimed to investigate the association between staying at home during the pandemic and the number of conceptions in Brazil. We gathered data on all registered births in Brazil throughout 2020 and 2021, including date and place of birth, as well as mother's characteristics. The database also informs gestational age at birth in weeks, so we can approximate the week of conception. To ensure our data consider the total number of conceptions and not only those leading to live births, we also collected data on the number of fetal deaths and estimate conception dates for pregnancies that did not lead to live births. We then combine these numbers with daily social isolation data by municipality, measured by an aggregate index of geographical isolation, and estimate econometric models to assess the effect of stay-at-home guidelines on conceptions.

## Materials and methods

Data wrangling and analysis were conducted with R version 4.1.2 [30], with the “tidyverse” [31], “estimatr” [32], “stargazer” [33], and “lfe” [34] packages. Moreover, calculations for margin effects were conducted with Stata version 15.0 [35] using package “reghdfe” [36].

## Data

We extracted birth data from the Sistema Nacional de Nascidos Vivos—SINASC, which is managed by the Brazilian Ministry of Health (specifically, by the Secretaria de Vigilância em Saúde SVS/MS). Data for all Brazilian states, from 2012 to 2020, were downloaded from DATASUS, a system used by the Ministry of Health to publicize data, and the preliminary 2021 data were from the SVS/MS website itself. Files were downloaded as DBC/DBF, which we converted to CSV for proper data cleaning and structuring. Each record represents a child born in Brazil, with detailed information about health at birth and mother characteristics. The variables we used in the analysis were municipality of residence, date of birth, mother's education, gestational age at birth in weeks, the number of other children the mother has given birth to, and the mother's age in years.

We then calculated the estimated date of conception for each birth, by subtracting seven times the number of gestation weeks from the date of birth. We deleted observations that had no data for birth weight, type of delivery, mother's education or gestational length. We also excluded observations with mother age registered as less than 10 or more than 85 years old, which would almost certainly be input errors. All of those excluded observations accounted for ~5% of total records. Additionally, we excluded births from three microregions (Fernando de Noronha, Traipu and Auriflana) which had too few records. Together, they account for less than 0.01% of the Brazilian population.

In our main statistical analysis, we control for the number of deaths in the municipality week. In order to do that, we downloaded data on deaths records in Brazil from the Sistema de Informações sobre Mortalidade (SIM), also managed by SVS/MS and published in DATASUS. We extracted data on municipality of residence and date of death for deaths in all Brazil from 2015 to 2020. Due to underreporting, excess mortality has typically been used to measure mortality in the pandemic, instead of confirmed COVID-19 deaths [37, 38]. In this context, [39] showed that excess mortality was negatively correlated with live birth numbers in Europe. We thus include total deaths and model weekly variations controlling for seasonal patterns.

Importantly, changes in birth patterns might be associated not with pregnancy rates, but with variability in fetal mortality and abortions. To account for this, we also obtained data on registered fetal deaths, also from SIM (DOFET—Declarações de Óbitos Fetais) and available in DATASUS. Again, as data for 2021 is preliminary, it was downloaded from a different

source, the Portal Brasileiro de Dados Abertos—Base de Registros SIM 2021. We estimated the date of conception for those fetuses in the same way as we did with live births.

To measure social isolation, we used the Social Distancing Index calculated by In Loco, which leverages anonymized cellphone locational data from millions of devices across the country and calculates, by municipality and date, the share of people who stayed within a 450 radius of their houses. The index has been used extensively by the media and government throughout the pandemic, correlates adequately with other mobility indices such as Google Mobility and has also been used in several scientific publications [40, 41]. Other data sources included estimates of population in 2020 by municipality from the Instituto Brasileiro de Geografia e Estatística—IBGE and GDP per capita by municipality in 2018 (latest available data), also calculated by IBGE. To categorize municipalities into urban and rural, we again used IBGE's classification.

Our study has an ecological design and uses only secondary data obtained from publicly available datasets, so it is exempt from approval by an institutional review board. Although the isolation index dataset uses anonymized individual location data to calculate the indices, it does not pose risks to individuals as it does not collect civil information such as name or social security number, and the data was aggregated by municipality by the company that collected it and publicized at the aggregated level. The birth microdata is also anonymized by the Brazilian Ministry of Health, and we aggregated it at municipality/week level, so that it is not possible to identify any individual-level information.

For our main dataset, data were grouped by municipality and week. We defined a week number as the number of weeks since December 30<sup>th</sup>, 2019. Week number 0, therefore, starts on Monday Dec 30<sup>th</sup>, 2019, and ends on Sunday Jan 5<sup>th</sup> 2020; week number 1 starts on Monday Jan 6<sup>th</sup> 2020 and ends on Sunday Jan 12<sup>th</sup> 2020; etc. Our sample includes weeks 5 (starting on Monday, Feb 2<sup>nd</sup>) to 29 (starting on Monday, Jul 20<sup>th</sup>). Even though we have data for births throughout the whole year, our isolation data is limited for this time period (February to July) and therefore we are not able to analyze other months. Besides calculating total conceptions by municipality and week, we also calculated conceptions considering two categories of mother age and mother education: for age, we considered four categories corresponding to the quartiles of the age distribution in the sample; for education, we considered mothers who have not completed high school vs mothers who have completed high school or higher levels of education. This categorization was chosen based on the variables provided in the source datasets and in previous research that shows that completing high school is a strong determinant of fertility choices [42, 43]. We also grouped mothers in two categories according to the previous number of live children (no previous children vs one or more previous children.)

To group the isolation data, we first excluded municipalities for which there was no isolation data available for all days in our dataset (which encompasses February to July). The original dataset had data for 4778 municipalities (out of 5570 municipalities in Brazil), exclusion due to missing isolation data left us with 3633 and further exclusion of the three microregions mentioned previously left us with 3628 municipalities. Then, we calculated mean isolation by week for each municipality. Our main regression models, however, include only municipalities with more than ten births per week, to avoid abnormal variations in the change of log births. For robustness, we also created a dataset grouped by microregion instead of municipalities, as well as a dataset grouped by municipality and month instead of weeks to reduce measurement errors due to a very small number of births. A first look at the data also involved analyzing grouped data by state (Brazil has 27 states including the capital's federal unit). To group by microregion and state, we weighted isolation data by each municipality's population.

## Statistical analysis

We started with descriptive analysis, grouping the data by state and calculating changes in isolation between months to check whether these numbers were correlated with conceptions. We calculated changes in conceptions adjusting for seasonal effects by using double-differences, i.e., comparing changes in (log) conceptions over two consecutive months in 2020 with the same two months in 2019.

Many studies have applied statistical and mathematical models to different settings amid the COVID-19 pandemic. Transmission and mortality, for example, have typically been analyzed with SIR-Poisson or Bayesian modelling [44, 45]. The same approach has been used to model the effects of lockdowns and social distancing [46]. To assess causal effects, correcting for time-invariant factors in small units of analysis, high-dimensional fixed effect models have been widely used [47, 48]. Following this line of studies, in our main analysis, we aggregate all data by week and municipality and estimate Multi-Way Fixed-Effect models to assess the effect of social distancing on conceptions, starting with the following equation:

$$\ln(\text{Concep}_{t,i}) = \alpha_i + \beta \text{Isolated}_{t,i} + \gamma \ln(\text{Deaths}_{t,i}) + \delta_t + \theta_i t + \varepsilon_{t,i},$$

Where  $\delta_t$  are week fixed-effects that control for seasonal effects and the advance of the covid pandemic throughout Brazil,  $\alpha_i$  are municipality fixed-effects that control for unobserved municipality-specific characteristics that are fixed over our sample period, such as population, GDP, location, poverty and other factors, and  $\text{Deaths}_{t,i}$  represents the number of deaths in the municipality/week, which could also play an important role in determining conceptions. The term  $\theta_i t$  allows for different municipality-specific time trends (t) over time and  $\varepsilon_{t,i}$  is a random error.

We take first-differences across successive weeks to eliminate the fixed effects, obtaining the equation that will be taken to the data:

$$\Delta \ln(\text{Concep}_{t,i}) = \beta \Delta \text{Isolated}_{t,i} + \gamma \Delta \ln(\text{Deaths}_{t,i}) + \delta_t + \theta_i + f_{im} + \Delta \varepsilon_{t,i},$$

In the main specification we also include interactions between municipality and months fixed-effects ( $f_{im}$ ), so that the variation used to estimate the effect of isolation comes solely across weeks of the same month, to control for seasonality effects in the change in conceptions.

Regressions are weighted by population size and are adjusted for clusters at the municipality levels to allow for heteroskedasticity and serial correlation within municipalities over time. We carry out several robustness tests, such as controlling for municipality-specific trends over time, aggregating the data to the microregion level and using months instead of weeks to allow for measurement errors in the computation of births. We compute heterogeneous effects by education, age, number of previous kids, municipality size and poverty levels (S1 and S2 Tables). We conduct placebo tests by regressing conceptions in each year between 2012 and 2019 on the 2020 week isolation rates to examine whether spurious correlations could be driving our results (S1 Fig). In the main analysis we exclude municipalities with less than 10 conceptions per week, but we also carry out robustness tests with different exclusion criteria, as well as using different model specifications, such as using absolute values instead of logs and estimating unweighted regressions (S3 Table). Finally, we also aggregate data by different weekdays to ensure our results are not driven by random chance due to our grouping criteria (S4 Table). All tests confirm the robustness of our results.

## Results

[Fig 1A](#) shows that there is a clear decline in the total number of conceptions in 2020 relative to previous years, even after considering seasonal trends. Conceptions are calculated as daily averages by month to account for different numbers of days in each month. The colored lines show two-year pairs averages (except for 2020) and the grey band shows minimum and maximum values in each year from 2012 to 2019. Though fertility in Brazil had been declining prior to the pandemic [49], [Fig 1A](#) shows that the number of conceptions in January and February 2020 were still within the range of previous years. However, starting in March 2020, the number of conceptions dropped below the range of previous years for all months.

[Fig 1B](#) shows changes in State-level conceptions rates adjusted for seasonal effects by using double-differences, i.e., comparing changes in (log) conceptions over two consecutive months in 2020 with the same two months in 2019. Monthly conceptions vary because human fertility is markedly seasonal, mainly due to physiological factors associated with temperature and photoperiod [50]. The figure shows that changes in conceptions vary substantially across States, with a marked decline in conceptions in April, especially in regions more affected by Covid-19 outbreaks, such as in the Amazon State, which saw a devastating outbreak in its capital (Manaus) in April [40]. Interestingly, the figure shows an increase in conceptions in these regions after May, suggesting a reversion back to the mean which coincides with a decrease in isolation rates ([Fig 2A](#)).

We then combined the data on conceptions with information on social isolation, measured by the share of people who stayed close to their houses, disaggregated by municipality and day. [Fig 2A](#) displays the behavior of isolation over time, comparing more educated with less educated individuals, showing that isolation increased more among the more educated. A simple correlation analysis with data aggregated by month and state displayed in [Fig 2B](#) shows a negative relationship between seasonally adjusted variation in conception rates and changes in isolation.

[Table 1](#) reports the main results from our Fixed Effects models. Municipalities with less than ten births per week are excluded. Column (1) only controls for week fixed-effects, and the estimated coefficient is negative and statistically significant. Column (2) controls for the changes in the number of deaths, showing that mortality does not seem to impact the number of conceptions. Column (3) includes municipality fixed-effects to control for trends in conceptions over the months and the results do not change qualitatively. Column (4), our preferred specification, includes month fixed effects and municipality-month interactions, to capture variations within each month and municipality. The results are significant and even greater in magnitude. In column (5), we aggregated the data to the microregion level, as there are many municipalities with few conceptions in a week. The impact remains very similar. When examining the relationship at the municipality/month level in column (6), to allow for measurement errors, we again obtain similar results.

[Fig 3A](#) illustrates the main effects obtained in column (4), showing estimates and 95% confidence intervals (CI). It shows that when isolation decreases by 5 pp. the number of conceptions increases by 3.1% (CI 95% 1.3%–4.9%; effect size 0.10). An increase in isolation of 9 pp, on the other hand, decreases conceptions by 3.9% (CI 95% 6.6%–1.1%; effect size 0.18).

[Fig 3B and 3C](#) shed light on the different mechanisms that may be driving these results, by showing effects for different groups of municipalities and women's characteristics of an increase in isolation of 9pp. When comparing richer and poorer municipalities, [Fig 3B](#) shows that the effect is only statistically significant in the richer ones, where the number of conceptions decreases by 3.9% (CI 95% 7.1–0.8%, effect size 0.18), in urban cities, with a similar decrease of 4.0% (CI 95% 6.8%–1.1%, effect size 0.18) and in bigger cities, decreasing by 4.2%

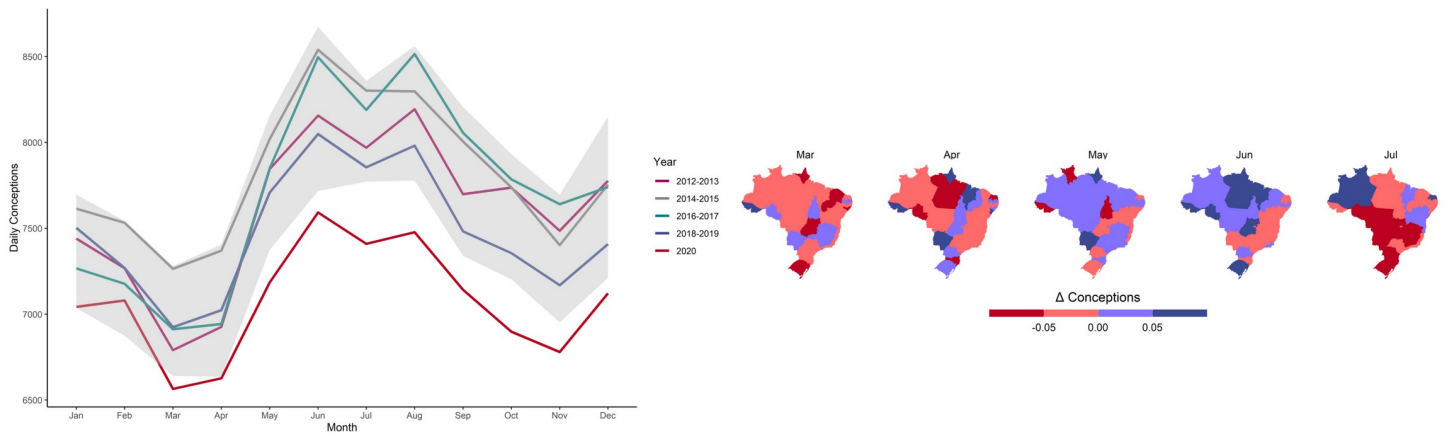

**Fig 1. 2020 conceptions in Brazil.** (A) Total conceptions in Brazil by year. Conceptions are calculated as daily averages by month to account for different numbers of days in each month. Colored lines show two-year pairs averages (except for 2020) and the grey band shows minimum and maximum values from 2012 to 2019. (B) Double differences in conceptions by state in 2020. Rates are calculated as double differences in log conceptions, by subtracting conceptions in each month by the number in the previous month, and then taking the difference of this variation and the same variation in the previous year. This controls for seasonal changes that occur every year. The variation shown is thus calculated as:  $(\ln \text{Concep}_{m,2020} - \ln \text{Concep}_{m-1,2020}) - (\ln \text{Concep}_{m,2019} - \ln \text{Concep}_{m-1,2019})$  for  $m = \text{March, April, May, June, and July}$ .

<https://doi.org/10.1371/journal.pone.0289604.g001>

(CI 95% 7.5%-0.9%, effect size 0.23). Meanwhile, the results are not significant for those municipalities that are smaller (CI 95% -9.2%+1.6%), rural (CI 95% -21.6%+5.0%), and poorer (CI 95% -9.9%+2.5%),

Moreover, the more educated women (who completed high school) are most affected, with a decrease of 4.0% (CI 95% 7.3%-0.8%, effect size 0.16), whereas for less educated women the estimated effect is not statistically different from zero (CI 95% -9.1%+2.3%). Women in the second quartile of the age distribution (aged between 21 and 25) are more affected, with a decrease in conceptions of 9.7% (CI 95% 15.0%-4.4%, effect size 0.20) when the share of people staying close to their homes increased by 9pp. Meanwhile, the effect is not statistically significant among women in the other age groups (aged < 21 : CI 95% -10.2%+5.1%; aged 26–32 : CI 95% -7.0%+3.0%; aged > 32 : CI 95% -5.6%+5.2%). Finally, the effect is slightly larger for women who had already given birth to live children previously at 5.3% (CI 95% 9.6%-1.1%, effect size 0.18) while it is not significant for women who did not have previous children (CI 95% -6.0%+3.9%).

## Discussion

Our results show that there is a robust negative relationship between the share of people isolated and the number of conceptions during the COVID-19 pandemic in Brazil. The effect is stronger for younger and more educated women, as well as for richer, larger, and more urbanized municipalities. This result is in line with what was observed during the Zika epidemic in Brazil [26, 27], and with theories about potential heterogeneous effects of isolation on pregnancy behavior amid the COVID-19 pandemic.

It has been argued that a fertility decline would be more likely in high income regions due to a worsening of the work-life balance, rising financial struggles, and reduced access to assisted reproductive technologies. Additionally, the lack of outsourced childcare imposes more burden on parents since children are always at home, which could also lower conceptions rates [7]. In poorer areas, the impacts could go in the opposite direction, as restricted access to contraceptive methods would lead to increases in unintended pregnancies, and rising inequality and poverty levels could represent setbacks in the long term reductions in fertility that have been associated with development in the past decades [7]. Teenage pregnancies could rise in

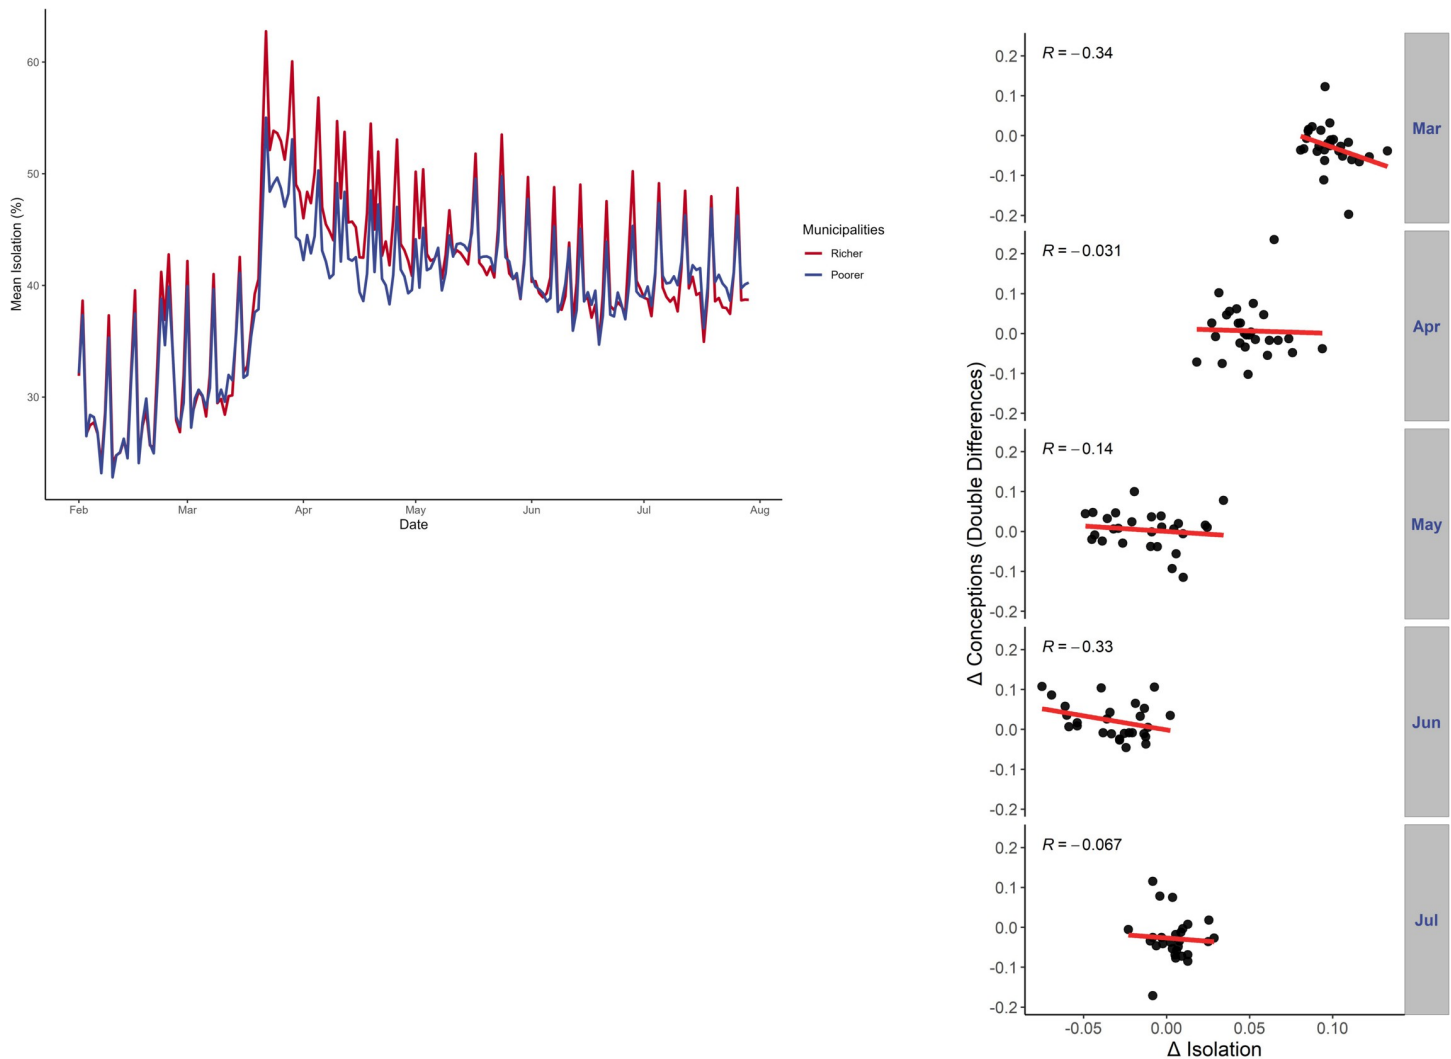

**Fig 2. Isolation in Brazil.** (A) Figure plots daily mean isolation index calculated as a weighted average of each municipality's index, weighted by population. The index considers the share of people who stayed within a 450m radius to their houses on each day. Municipalities are grouped as rich or poor according to the median value of their GDP per capita. (B) Scatterplots of the monthly variation in isolation for each Brazilian state with respect to the previous month (X-axis) and double differences in conceptions, as defined in Fig 1B (Y-axis).  $R$  is the Pearson correlation coefficient.

<https://doi.org/10.1371/journal.pone.0289604.g002>

these areas as well, due to prolonged school closures [51]. Although we are not able to pin down the exact reason behind the fertility changes during stay-at-home periods, our findings support these theoretical predictions, and shed light on what the main drivers of these observations might be.

First, it seems that most potential increases in fertility during the pandemic would be due to unintended pregnancies. Indeed, in the UK unintended pregnancies almost doubled in 2020, mainly due to restricted access to contraception [52]. The heterogeneities we observe also support this conclusion, as we find that the fertility reductions were larger for more educated women. It has been also argued that economic shocks are more likely to affect younger women's pregnancy decisions, as they have more fertile time left to make up for postponed child-bearing [53]. Therefore, the group most likely to reduce planned pregnancies during the social isolation period would be those women who still have some fertile years remaining but are not in their teenage years, which are more prone to unintended pregnancies. In line with these



Table 1. Effect of isolation on conceptions.

|                        | $\Delta \ln$ Conceptions |                      |                      |                      |                      |                      |
|------------------------|--------------------------|----------------------|----------------------|----------------------|----------------------|----------------------|
|                        | (1)                      | (2)                  | (3)                  | (4)                  | (5)                  | (6)                  |
| $\Delta \ln$ Isolation | -0.385***<br>(0.133)     | -0.372***<br>(0.133) | -0.372***<br>(0.133) | -0.500***<br>(0.166) | -0.526***<br>(0.141) | -1.372***<br>(0.052) |
| $\Delta \ln$ Deaths    |                          | -0.007<br>(0.008)    | -0.007<br>(0.008)    | -0.007<br>(0.009)    | 0.0002<br>(0.009)    | 0.051***<br>(0.014)  |
| Two Way Fixed Effects: |                          |                      | Y                    | Y                    | Y                    |                      |
| Month interactions:    |                          |                      |                      | Y                    | Y                    |                      |
| Group by microregion:  |                          |                      |                      |                      | Y                    |                      |
| Group by month:        |                          |                      |                      |                      |                      | Y                    |
| Observations           | 10,944                   | 10,944               | 10,944               | 10,944               | 11,400               | 12,050               |
| R <sup>2</sup>         | 0.032                    | 0.032                | 0.034                | 0.101                | 0.119                | 0.125                |

Each regression (column) estimates the effect of social distancing on the number of conceptions. Columns (1)-(4) are grouped by week and municipality, column (5) is grouped by week and microregion and column (6) is grouped by month and municipality. Variables are included as first differences between successive weeks or months (Conceptions and Deaths are log-differences). All regressions are weighted by municipality or microregion population. Columns (1) and (2) include week fixed effects; columns (3) and (4) include week and municipality fixed effects; column (5) includes week and microregion fixed effects; column (6) includes municipality and microregion fixed effects. Columns (4) and (5) include municipality-month (or microregion-month) interactions and month fixed effects. Standard errors are reported in parentheses and clustered at the municipality or microregion level. Significance:

\*\*\*p < 0.01

\*\*p < 0.05

\*p < 0.1.

<https://doi.org/10.1371/journal.pone.0289604.t001>

predictions, the largest effect was observed among women aged 21 to 25 years old, representing the second quartile of the age distribution in our sample. This suggests that a significant portion of the decline in conceptions witnessed in Brazil is likely attributable to planned pregnancies.

The decision to postpone childbearing during the pandemic could also be caused by fear of infection. Mothers might fear getting ill during pregnancy and have to go to crowded hospitals, where the risk of contamination is higher, or that the newborn might contract the virus right after labor. Although there have been reports of such concerns in surveys with pregnant women, they have also responded being worried about changes in maternity services, such as availability of midwives and restrictions on partners' attendance at birth [54, 55]. Since the number of weekly deaths in each municipality is not significant in our statistical models, it seems that fear of contracting the virus itself is not a main factor in fertility changes. Instead, the heterogeneities we observe suggest that the main reason driving this reduction is the increase in overall uncertainty and financial instability leading to postponement of pregnancies.

Rising unemployment is associated with fertility reductions, but financial concerns are not the only reason why shutdowns could reduce pregnancy intentions [56]. The psychological burden of isolation increases stress and anxiety which can negatively impact fertility choices [57]. The weekly granularity of our data could suggest that the immediate financial consequences of shutdowns are not as significant as overall stress and concerns regarding the potential duration and extension of the lockdown measures. That is, weekly changes in isolation patterns have more immediate consequences in anxiety and stress, whereas unemployment might not fluctuate as much due to fixed costs and labor contracts [58]. Moreover, educated women have access to more information during the pandemic and thus might be more susceptible to such fears and stress, as opposed to financial concerns, especially since they are more

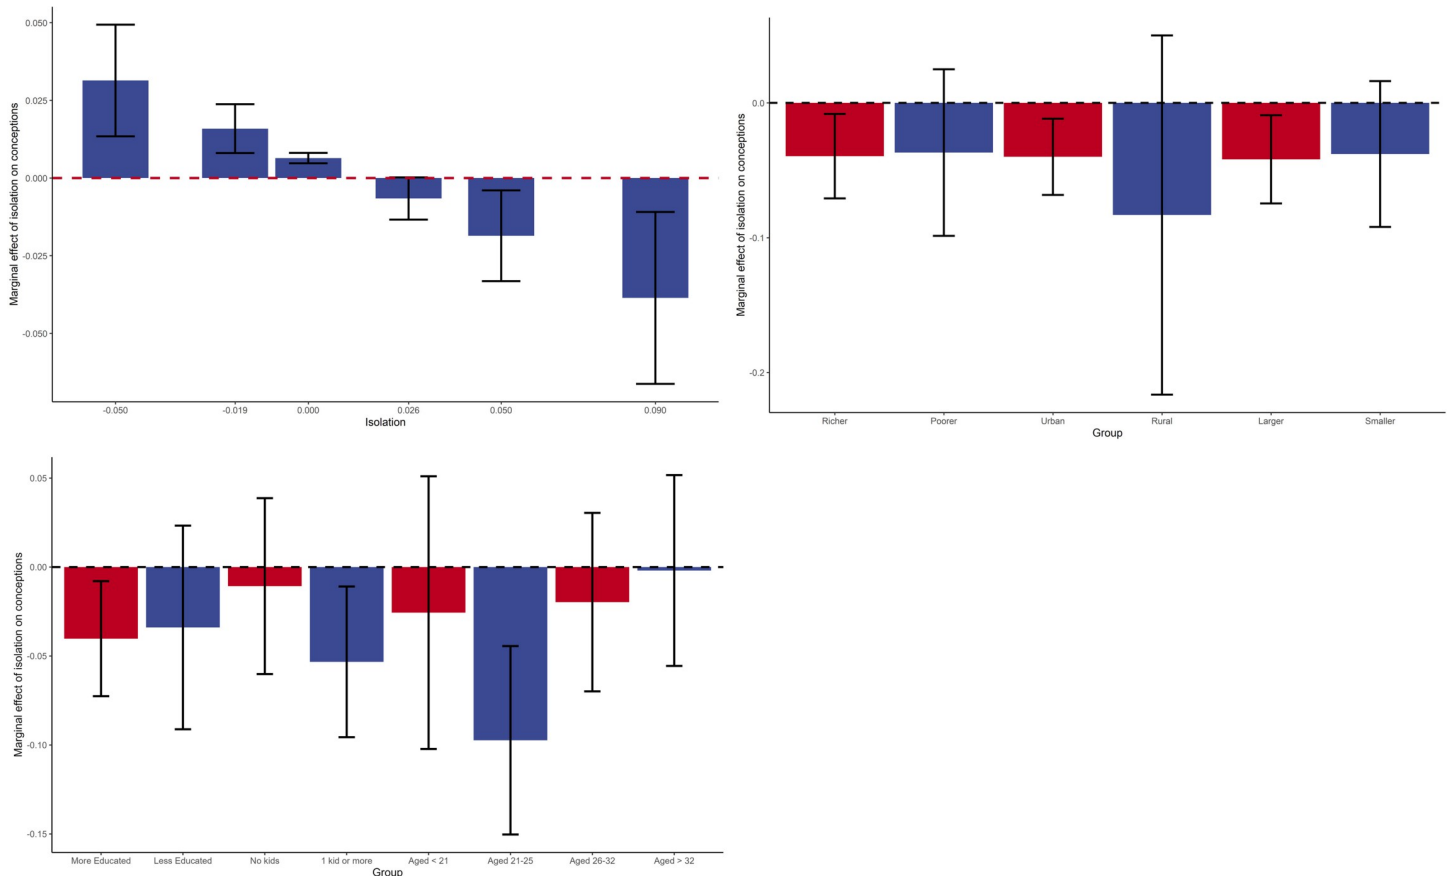

**Fig 3. Marginal and heterogeneous effects of isolation on conceptions.** The figure illustrates our main results based on Column (4) of Table 1, showing linear predictions of the effect of isolation on conceptions for the fitted model in our main specification (A) and heterogeneous effects when considering different groups of either municipalities (B) or women (C). 95% C.I.'s are also included. Shown in the heterogeneous effects plots are marginal effects for a 9 p.p change in isolation. Groups are defined as follows, with the total number of observations for each regression in parentheses: richer (poorer) municipalities—annual 2018 GDP per capita above (below) the median of BRL 17,427 (N = 8,352 and N = 2,592); urban/rural follows IBGE's classification (N = 10,560 and N = 384); larger (smaller)—population above (below) 120,000 people (N = 6,336 and N = 4,608); more (less) educated are women who completed (did not complete) high school (N = 10,944 and N = 10,748); no kids vs 1 kid or more considers the number of previous births to live children the mother has given (N = 10,888 and N = 10,944); age categories are grouped according to the quartiles of the distribution of mothers in the sample (N = 10,587, N = 10,910, N = 10,937, and N = 10,777 respectively). Full regression results are shown in S1 and S2 Tables.

<https://doi.org/10.1371/journal.pone.0289604.g003>

likely to be able to work from home without losing any income. Therefore, our findings suggest that the main drivers of the reduction in fertility are increases in stress and overall uncertainty that lead young, educated mothers to postpone planned pregnancies.

Interestingly, [25] found opposite results in Australia: lockdowns had negative impacts on fertility intentions, but these effects were more pronounced among older and less educated women. This may be explained for several reasons, such as large differences between the two countries, particularly considering that there were stronger lockdown policies in Australia. Moreover, the outcome they measured is fertility plans, not actual births. Especially considering that Brazil's unequal reality has impacts on women health and fertility [59], an increase in unwanted pregnancies among less educated women in Brazil could have offset any reductions in planned pregnancies. This shows that regions that have distinct socioeconomic and cultural profiles had different effects on fertility, which points to a need for further research.

It remains an open question, however, whether these reductions will have a long-term impact on fertility changes in Brazil and worldwide. Since the number of conceptions increase again when isolation decreases, these effects alone are unlikely to cause long-term fertility

changes in Brazil. Yet, social distancing was only one of the many ways in which the pandemic affected society, which could also have impacted fertility. Moreover, it is possible that this was more pronounced during the first wave in the beginning of 2020, when fear and uncertainty was highest, and might not have been as intense in following outbreaks. Still, even as vaccination advanced early in 2021, Brazil suffered a severe third wave of COVID-19 and the Brazilian Health Ministry asked women, particularly younger ones, to postpone pregnancies when possible [60].

One potential limitation of our study is sampling bias, since we do not have data on every municipality in the country. However, we include data for all 27 Brazilian states, which have very different sociodemographic characteristics, and we test several sampling strategies to alleviate this concern. In our main specification, we exclude municipalities in which there are weeks with 0 deaths or less than 10 conceptions. Therefore, our main sample represents 456 municipalities (and we have data for 24 weeks, thus  $N = 10,944$  in Table 1), which account for about 62% of the total Brazilian population. When we group by microregion, we keep 475 microregions (out of 558 in the country), accounting for over 95% of the country's population. Finally, when grouping by municipality and month, we keep 2,410 municipalities (times 5 months,  $N = 12,050$ ), accounting for  $\sim 88\%$  of the population. To ensure our results are not driven by these arbitrary criteria, we carry out robustness tests with different exclusion criteria and different model specifications, and all tests confirm our results.

Additionally, our recent data are preliminary, which could also bias results. However, the Ministry of Health continuously receives birth information from State and municipality governments throughout the year and updates its databases. Although the microdata are only consolidated and released twice a year, there is a system that continuously keeps track of the total number of registered births as they are updated [61]. Comparing our preliminary data with the most recent numbers posted on this webpage, there is no difference for all months in 2020, and differences smaller than 2%, 3% and 7% for the first three months of 2021 respectively. This could, however, still cause small differences in our results if the missing data are not randomly distributed across municipalities and weeks. A related potential problem is that there might also be measurement errors in the reported gestation weeks which we use to estimate conception dates, as well as in other reported information such as mother's age and education. The robustness tests that we carry out by grouping observations by microregion and month help alleviate these concerns regarding measurement error and outdated data.

External validity might be another concern, both spatially and temporally. We only use data that refer to the first months on the pandemic, and Brazil might have specific cultural characteristics that lead to unique fertility patterns. Further studies should address cross-country heterogeneous effects to study implications for population trends worldwide, as well as continue investigating these effects to assess whether any future waves will have different consequences.

## Conclusions

We combined administrative data on births and fetal deaths with daily geographical isolation data to assess the effects of social distancing on the number of conceptions in Brazil. Using high dimensional fixed effects models, we found a robust negative relationship between the share of people isolated and the number of conceptions during the COVID-19 pandemic in Brazil. The effect is stronger for women between 21 and 25 years old and more educated, as well as for richer, larger, and more urbanized municipalities.

The main drivers of the reduction in fertility appear to be increases in stress and overall uncertainty that lead young, educated mothers to postpone planned pregnancies. However, detailed analyses of the mechanisms are needed. Future research could explore different study

designs that can provide robust evidence regarding the causal mechanisms behind the relationship between isolation and fertility, such as the role of stress, anxiety, and uncertainty in shaping pregnancy decisions. Moreover, it remains an open question whether these reductions will have a long-term impact on fertility changes in Brazil and worldwide, and whether other aspects of the COVID-19 pandemic also affected fertility.

Our findings have important implications for policymakers and healthcare providers. It highlights the need to take fertility into account in situations not immediately related to reproductive health. This relates to the need to improve access to contraception and reproductive health services, especially in poorer areas where restricted access to contraceptive methods can lead to increases in unintended pregnancies.

## Supporting information

**S1 Fig. Placebo tests for several years.** Figure shows coefficients and 95% CI's for the effect of social isolation on conceptions when using conception data for different years (placebo regressions). All regressions follow the main specification of column (4) of Table 1, such that the last data point on the chart (2020) represents our main specification. Variables are included as first differences between successive weeks (Conceptions and Deaths are log-differences). All regressions are weighted by municipality population and standard errors are clustered at the municipality level.

(TIF)

**S1 Table. Heterogeneous effects of isolation on conceptions for different municipality groups.** Each regression (column) estimates the effect of social distancing on the number of conceptions in a subsample of municipalities. Variables are included as first differences between successive weeks or months (Conceptions and Deaths are log-differences). Groups are defined as follows: richer (poorer) municipalities—annual 2018 GDP per capita above (below) BRL 17,427; urban/rural follows IBGE's classification; larger (smaller)—population above (below) 120,000 people. All regressions are weighted by municipality population and include month, week and municipality fixed effects and municipality-month interactions. Standard errors are reported in parentheses and clustered at the municipality level. Significance: \*\*\* $p < 0.01$ ; \*\* $p < 0.05$ , \* $p < 0.1$ .

(DOCX)

**S2 Table. Heterogeneous effects of isolation on conceptions for different women groups.** Each regression (column) estimates the effect of social distancing on the number of conceptions for a group of women. Variables are included as first differences between successive weeks or months (Conceptions and Deaths are log-differences). Groups are defined as follows: more (less) educated are women who completed (did not complete) high school; no kids vs previous kids considers the number of previous births to live children the mother has given; age groups are divided according to the quantiles in the sample. All regressions are weighted by municipality population and include month, week and municipality fixed effects and municipality-month interactions. Standard errors are reported in parentheses and clustered at the municipality level. The number of observations reported might not match the numbers mentioned in the caption for Fig 3 due to the exclusion of singleton observations for the margin calculations. Significance: \*\*\* $p < 0.01$ ; \*\* $p < 0.05$ , \* $p < 0.1$ .

(DOCX)

**S3 Table. Alternative model specifications.** Each regression (column) estimates the effect of social distancing on the number of conceptions. Variables are included as first differences between successive weeks (Conceptions and Deaths are log-differences, except in column (4)).

Columns (1)-(4) exclude municipalities with 0 deaths or less than 10 conceptions per week. Column (5) includes all municipalities for which we have data. Column (6) excludes municipalities with 0 deaths or conceptions per week. Column (7) excludes municipalities with 0 deaths or less than 20 conceptions per week. Weighted regressions are weighted by municipality population. Standard errors are reported in parentheses and clustered at the municipality level. Significance: \*\*\* $p < 0.01$ ; \*\* $p < 0.05$ , \* $p < 0.1$ .

(DOCX)

**S4 Table. Aggregation by different weekdays.** Each regression (column) estimates the effect of social distancing on the number of conceptions aggregating daily data by different weekdays. Column (1) is the baseline specification, and aggregates data weekly starting on Monday Feb 3rd 2020. Column (2) aggregates data starting on Tuesday Feb 4th 2020, Column (3) on Wednesday Feb 5th 2020 etc. Variables are included as first differences between successive weeks (Conceptions and Deaths are log-differences). Regressions are weighted by municipality population and include month, week and municipality fixed effects and municipality-month interactions. Standard errors are reported in parentheses and clustered at the municipality level. Significance: \*\*\* $p < 0.01$ ; \*\* $p < 0.05$ , \* $p < 0.1$ .

(DOCX)

## Author Contributions

**Conceptualization:** Luca Moreno-Louzada, Naercio Menezes-Filho.

**Data curation:** Luca Moreno-Louzada.

**Investigation:** Luca Moreno-Louzada, Naercio Menezes-Filho.

**Methodology:** Luca Moreno-Louzada, Naercio Menezes-Filho.

**Project administration:** Naercio Menezes-Filho.

**Supervision:** Naercio Menezes-Filho.

**Validation:** Naercio Menezes-Filho.

**Writing – original draft:** Luca Moreno-Louzada, Naercio Menezes-Filho.

**Writing – review & editing:** Luca Moreno-Louzada, Naercio Menezes-Filho.

## References

1. Gostin LO, Friedman EA, Hossain S, Mukherjee J, Zia-Zarifi S, Clinton C, et al. Human rights and the COVID-19 pandemic: a retrospective and prospective analysis. *The Lancet*. 2022.
2. World Economic Outlook, October 2021: Recovery During A Pandemic. In: IMF [Internet]. [cited 27 Jan 2023]. Available: <https://www.imf.org/en/Publications/WEO/Issues/2021/10/12/world-economic-outlook-october-2021>
3. Shoichet CE. A baby boom during the coronavirus pandemic isn't likely, experts say. In: CNN [Internet]. [cited 29 Nov 2021]. Available: <https://edition.cnn.com/2020/04/04/us/baby-boom-coronavirus-demographics/index.html>
4. United Nations Population Fund (UNFPA). New UNFPA projections predict calamitous impact on women's health as COVID-19 pandemic continues. In: UNFPA [Internet]. [cited 29 Nov 2021]. Available: <https://www.unfpa.org/press/new-unfpa-projections-predict-calamitous-impact-womens-health-covid-19-pandemic-continues>
5. Bloom-Feshbach K, Simonsen L, Viboud C, Mølbak K, Miller MA, Gottfredsson M, et al. Natality decline and miscarriages associated with the 1918 influenza pandemic: the Scandinavian and United States experiences. *Journal of Infectious Diseases*. 2011; 204: 1157–1164.
6. Percheski C, Kimbro R. How did the Great Recession affect fertility. *Focus*. 2014; 30: 26–30.

7. Aassve A, Cavalli N, Mencarini L, Plach S, Bacci ML. The COVID-19 pandemic and human fertility. *Science*. 2020; 369: 370–371.
8. Ullah M, Moin AT, Araf Y, Bhuiyan AR, Griffiths MD, Gozal D. Potential effects of the COVID-19 pandemic on future birth rate. *Frontiers in Public Health*. 2020; 8: 893.
9. Carp-Veliscu A, Mehedintu C, Frincu F, Bratila E, Rasu S, Iordache I, et al. The Effects of SARS-CoV-2 Infection on Female Fertility: A Review of the Literature. *International Journal of Environmental Research and Public Health*. 2022; 19: 984. <https://doi.org/10.3390/ijerph19020984> PMID: 35055804
10. Khalili MA, Leisegang K, Majzoub A, Finelli R, Panner Selvam MK, Henkel R, et al. Male Fertility and the COVID-19 Pandemic: Systematic Review of the Literature. *World J Mens Health*. 2020; 38: 506–520. <https://doi.org/10.5534/wjmh.200134> PMID: 32814369
11. Navarra A, Albani E, Castellano S, Arruzzolo L, Levi-Setti PE. Coronavirus Disease-19 Infection: Implications on Male Fertility and Reproduction. *Front Physiol*. 2020; 11. <https://doi.org/10.3389/fphys.2020.574761> PMID: 33312128
12. Chen F, Zhu S, Dai Z, Hao L, Luan C, Guo Q, et al. Effects of COVID-19 and mRNA vaccines on human fertility. *Human Reproduction*. 2022; 37: 5–13. <https://doi.org/10.1093/humrep/deab238> PMID: 34734259
13. Wainstock T, Yoles I, Sergienko R, Sheiner E. Prenatal maternal COVID-19 vaccination and pregnancy outcomes. *Vaccine*. 2021; 39: 6037–6040. <https://doi.org/10.1016/j.vaccine.2021.09.012> PMID: 34531079
14. Luppi F, Arpino B, Rosina A. The impact of COVID-19 on fertility plans in Italy, Germany, France, Spain, and the United Kingdom. *Demographic Research*. 2020; 43: 1399–1412.
15. Lindberg LD, VandeVusse A, Mueller J, Kirstein M. Early impacts of the COVID-19 pandemic: Findings from the 2020 Guttmacher Survey of Reproductive Health Experiences. In: Guttmacher Institute [Internet]. 2020 [cited 29 Nov 2021]. Available: <https://www.guttmacher.org/report/early-impacts-covid-19-pandemic-findings-2020-guttmacher-survey-reproductive-health>
16. Lin TK, Law R, Beaman J, Foster DG. The impact of the COVID-19 pandemic on economic security and pregnancy intentions among people at risk of pregnancy. *Contraception*. 2021; 103: 380–385. <https://doi.org/10.1016/j.contraception.2021.02.001> PMID: 33587906
17. Aassve A, Cavalli N, Mencarini L, Plach S, Sanders S. Early assessment of the relationship between the COVID-19 pandemic and births in high-income countries. *Proceedings of the National Academy of Sciences*. 2021; 118. <https://doi.org/10.1073/pnas.2105709118> PMID: 34462356
18. Sobotka T, Jasilioniene A, Galarza AA, Zeman K, Nemeth L, Jdanov D. Baby bust in the wake of the COVID-19 pandemic? First results from the new STFF data series. *SocArXiv [preprint]*. 2021.
19. Pomar L, Favre G, de Labrusse C, Contier A, Boulvain M, Baud D. Impact of the first wave of the COVID-19 pandemic on birth rates in Europe: a time series analysis in 24 countries. *Human Reproduction*. 2022; 37: 2921–2931. <https://doi.org/10.1093/humrep/deac215> PMID: 36228661
20. Backhaus A. A COVID-19 Baby Boom? Early Evidence from Four African Countries. *SocArXiv [preprint]*. 2021.
21. Emery T, Koops JC. The impact of COVID-19 on fertility behaviour and intentions in a middle income country. *Plos one*. 2022; 17: e0261509. <https://doi.org/10.1371/journal.pone.0261509> PMID: 34990459
22. Cohen PN. Baby Bust: Falling Fertility in US Counties Is Associated with COVID-19 Prevalence and Mobility Reductions. *SocArXiv [preprint]*. 2021.
23. Naito T, Ogawa H. COVID-19, self-restraint at home, and pregnancy: evidence from Japan. *Applied Economics Letters*. 2021; 1–4.
24. Berger LM, Ferrari G, Leturcq M, Panico L, Solaz A. COVID-19 lockdowns and demographically-relevant Google Trends: A cross-national analysis. *PLOS ONE*. 2021; 16: e0248072. <https://doi.org/10.1371/journal.pone.0248072> PMID: 33730055
25. Mooi-Reci I, Trinh T-A, Vera-Toscano E, Wooden M. The impact of lockdowns during the COVID-19 pandemic on fertility intentions. *Economics & Human Biology*. 2023; 48: 101214. <https://doi.org/10.1016/j.ehb.2022.101214> PMID: 36565491
26. Castro MC, Han QC, Carvalho LR, Victora CG, França GV. Implications of Zika virus and congenital Zika syndrome for the number of live births in Brazil. *Proceedings of the National Academy of Sciences*. 2018; 115: 6177–6182. <https://doi.org/10.1073/pnas.1718476115> PMID: 29844186
27. Marteleto LJ, Guedes G, Coutinho RZ, Weitzman A. Live births and fertility amid the Zika epidemic in Brazil. *Demography*. 2020; 57: 843–872. <https://doi.org/10.1007/s13524-020-00871-x> PMID: 32399856
28. de Oliveira WK, de França GVA, Carmo EH, Duncan BB, de Souza Kuchenbecker R, Schmidt MI. Infection-related microcephaly after the 2015 and 2016 Zika virus outbreaks in Brazil: a surveillance-based analysis. *The Lancet*. 2017; 390: 861–870.

29. Coutinho RZ, Lima LC de, Leocádio VA, Bernardes T. Considerações sobre a pandemia de Covid-19 e seus efeitos sobre a fecundidade e a saúde sexual e reprodutiva das brasileiras. *Rev Bras Estud Popul.* 2020; 37.
30. R Core Team. R: A Language and Environment for Statistical Computing. Vienna, Austria: R Foundation for Statistical Computing; 2021. Available: <https://www.R-project.org/>
31. Wickham H, Averick M, Bryan J, Chang W, McGowan LD, François R, et al. Welcome to the tidyverse. *Journal of Open Source Software.* 2019; 4: 1686. <https://doi.org/10.21105/joss.01686>
32. Blair G, Cooper J, Coppock A, Humphreys M, Sonnet L. estimatr: Fast Estimators for Design-Based Inference. 2022. Available: <https://CRAN.R-project.org/package=estimatr>
33. Hlavac M. stargazer: Well-Formatted Regression and Summary Statistics Tables. Bratislava, Slovakia: Social Policy Institute; 2022. Available: <https://CRAN.R-project.org/package=stargazer>
34. Gaure S. lfe: Linear Group Fixed Effects. 2021. Available: <https://CRAN.R-project.org/package=lfe>
35. StataCorp. Stata Statistical Software: Release 15. College Station, TX: StataCorp LP; 2017.
36. Correia S. reghdfe: Stata module for linear and instrumental-variable/gmm regression absorbing multiple levels of fixed effects. 2017. Available: <https://ideas.repec.org/c/boc/bocode/s457874.html>
37. Wang H, Paulson KR, Pease SA, Watson S, Comfort H, Zheng P, et al. Estimating excess mortality due to the COVID-19 pandemic: a systematic analysis of COVID-19-related mortality, 2020–21. *The Lancet.* 2022; 399: 1513–1536. [https://doi.org/10.1016/S0140-6736\(21\)02796-3](https://doi.org/10.1016/S0140-6736(21)02796-3) PMID: 35279232
38. Kupek E. How many more? Under-reporting of the COVID-19 deaths in Brazil in 2020. *Tropical Medicine & International Health.* 2021; 26: 1019–1028. <https://doi.org/10.1111/tmi.13628> PMID: 34008266
39. De Geyter C, Masciocchi M, Gobrecht-Keller U. Excess mortality caused by the COVID-19 pandemic negatively impacts birth numbers in European countries. *Human Reproduction.* 2022. <https://doi.org/10.1093/humrep/deac031> PMID: 35139195
40. Castro MC, Kim S, Barberia L, Ribeiro AF, Gurzenda S, Ribeiro KB, et al. Spatiotemporal pattern of COVID-19 spread in Brazil. *Science.* 2021; 372: 821–826.
41. Moraes RF de. Determinants of physical distancing during the covid-19 epidemic in Brazil: effects from mandatory rules, numbers of cases and duration of rules. *Ciênc saúde coletiva.* 2020; 25: 3393–3400. <https://doi.org/10.1590/1413-81232020259.21892020> PMID: 32876260
42. Berquó ES, Cavenaghi SM. Notas sobre os diferenciais educacionais e econômicos da fecundidade no Brasil. *Rev bras estud popul.* 2014; 31: 471–482. <https://doi.org/10.1590/S0102-30982014000200012>
43. Duarte HFFL Teixeira EC. Efeito do nível de escolaridade sobre a fecundidade no Brasil. *Economia & Região.* 2021; 9: 167–185. <https://doi.org/10.5433/2317-627X.2021v9n1p167>
44. Aouissi HA, Hamimes A, Ababsa M, Bianco L, Napoli C, Kebaili FK, et al. Bayesian Modeling of COVID-19 to Classify the Infection and Death Rates in a Specific Duration: The Case of Algerian Provinces. *International Journal of Environmental Research and Public Health.* 2022; 19: 9586. <https://doi.org/10.3390/ijerph19159586> PMID: 35954953
45. Ben Hassen H, Elaoud A, Ben Salah N, Masmoudi A. A SIR-Poisson Model for COVID-19: Evolution and Transmission Inference in the Maghreb Central Regions. *Arab J Sci Eng.* 2021; 46: 93–102. <https://doi.org/10.1007/s13369-020-04792-0> PMID: 32837814
46. Acemoglu D, Chernozhukov V, Werning I, Whinston MD. Optimal Targeted Lockdowns in a Multigroup SIR Model. *American Economic Review: Insights.* 2021; 3: 487–502. <https://doi.org/10.1257/aeri.20200590>
47. Lawton R, Zheng K, Zheng D, Huang E. A longitudinal study of convergence between Black and White COVID-19 mortality: A county fixed effects approach. *The Lancet Regional Health—Americas.* 2021; 1: 100011. <https://doi.org/10.1016/j.lana.2021.100011> PMID: 34528022
48. Okamoto S. State of emergency and human mobility during the COVID-19 pandemic in Japan. *Journal of Transport & Health.* 2022; 26: 101405. <https://doi.org/10.1016/j.jth.2022.101405> PMID: 35694018
49. Marteleto LJ, Sereno LGF, Coutinho RZ, Dondero M, Alves SV, Lloyd R, et al. Fertility trends during successive novel infectious disease outbreaks: Zika and COVID-19 in Brazil. *Cad Saúde Pública.* 2022; 38: EN230621. <https://doi.org/10.1590/0102-3111XEN230621> PMID: 35508025
50. Symul L, Hsieh P, Shea A, de Castro Moreno CR, Skene D, Holmes S, et al. Unmasking Seasonal Cycles in Human Fertility: How holiday sex and fertility cycles shape birth seasonality. *medRxiv [preprint].* 2020.
51. World Health Organization. School closures and teenage pregnancy. *Bull World Health Organ.* 2021; 99: 6–7. <https://doi.org/10.2471/BLT.21.020121> PMID: 33658730
52. Balachandren N, Barrett G, Stephenson JM, Yasmin E, Mavrelou D, Davies M, et al. Impact of the SARS-CoV-2 pandemic on access to contraception and pregnancy intentions: a national prospective

- cohort study of the UK population. *BMJ Sex Reprod Health*. 2021; bmjsrh-2021-201164. <https://doi.org/10.1136/bmjsrh-2021-201164> PMID: 34675063
53. Chatterjee S, Vogl T. Escaping Malthus: economic growth and fertility change in the developing world. *American Economic Review*. 2018; 108: 1440–67. PMID: 30091577
  54. Schrøder K, Stokholm L, Rubin KH, Jørgensen JS, Nohr EA, Petersen LK, et al. Concerns about transmission, changed services and place of birth in the early COVID-19 pandemic: a national survey among Danish pregnant women. The COVIDPregDK study. *BMC Pregnancy and Childbirth*. 2021; 21: 664. <https://doi.org/10.1186/s12884-021-04108-6> PMID: 34592953
  55. Dymecka J, Gerymski R, Iszczuk A, Bidzan M. Fear of Coronavirus, Stress and Fear of Childbirth in Polish Pregnant Women during the COVID-19 Pandemic. *Int J Environ Res Public Health*. 2021; 18: 13111. <https://doi.org/10.3390/ijerph182413111> PMID: 34948718
  56. Currie J, Schwandt H. Short- and long-term effects of unemployment on fertility. *Proceedings of the National Academy of Sciences*. 2014; 111: 14734–14739. <https://doi.org/10.1073/pnas.1408975111> PMID: 25267622
  57. Voicu M, Bădoi D. Fertility and the COVID-19 crisis: do gender roles really matter? *European Societies*. 2021; 23: S199–S214.
  58. Fancourt D, Steptoe A, Bu F. Trajectories of anxiety and depressive symptoms during enforced isolation due to COVID-19 in England: a longitudinal observational study. *The Lancet Psychiatry*. 2021; 8: 141–149. [https://doi.org/10.1016/S2215-0366\(20\)30482-X](https://doi.org/10.1016/S2215-0366(20)30482-X) PMID: 33308420
  59. Chiavegatto Filho AD, Kawachi I. Income inequality is associated with adolescent fertility in Brazil: a longitudinal multilevel analysis of 5,565 municipalities. *BMC Public Health*. 2015; 15: 103. <https://doi.org/10.1186/s12889-015-1369-2> PMID: 25884433
  60. Ministério da Saúde pede que, se possível, mulheres adiem gravidez até melhora da pandemia. In: G1 [Internet]. [cited 29 Nov 2021]. Available: <https://g1.globo.com/bemestar/vacina/noticia/2021/04/16/ministerio-da-saude-vacina-covid-gravidas.ghtml>
  61. Brazilian Ministry of Health. Paineis de Monitoramento de Nascidos Vivos. [cited 10 Jan 2022]. Available: <http://svs.aids.gov.br/dantps/centrais-de-conteudos/paineis-de-monitoramento/natalidade/nascidos-vivos/>
